# Supplementary material for: Development of sphere-shaped bimetallic Ti0.5Sr0.5O3 as an efficient bifunctional electrocatalyst for overall water splitting performance in alkaline media
Source: Royal Society of Chemistry journal article supplement (doi:10.1039/d6ra00224b), 2026-04-07
Supplement: d6ra00224b1.pdf [file d6ra00224b1.pdf]

## Development of sphere-shaped bimetallic $\text{Ti}_{0.5}\text{Sr}_{0.5}\text{O}_3$ as an efficient bifunctional electrocatalyst for overall water splitting performance in alkaline media

Kayalvizhi Rajagopal<sup>1</sup>, Abirami Natarajan<sup>1\*</sup>

<sup>1</sup>Department of Chemistry, College of Engineering and Technology, SRM Institute of Science and Technology, Kattankulathur, Tamil Nadu-603 203, India.

\*Corresponding author: Dr. N. Abirami

Mail ID: [abiramin@srmist.edu.in](mailto:abiramin@srmist.edu.in)

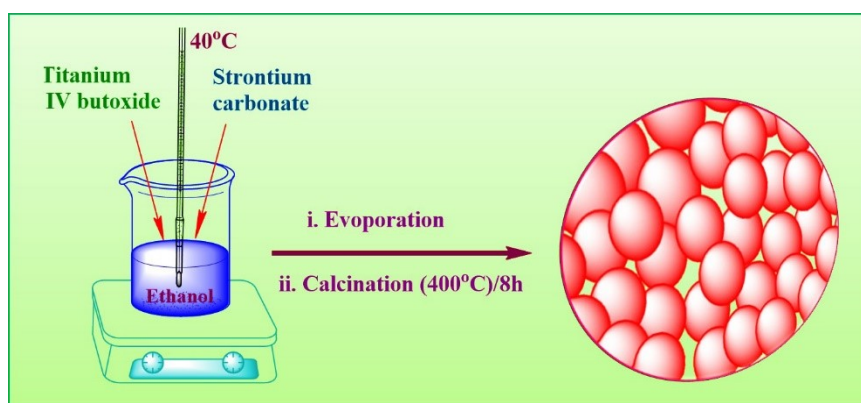

1. Synthesis of  $\text{Ti}_{0.5}\text{Sr}_{0.5}\text{O}_3$

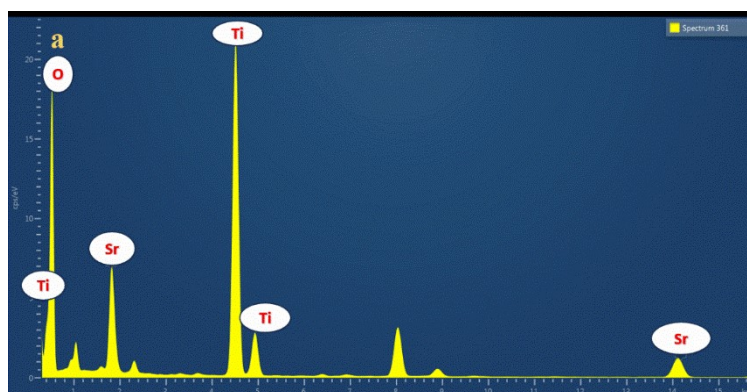

Figure S1. Schematic representation of the synthesis of  $\text{Ti}_{0.5}\text{Sr}_{0.5}\text{O}_3$

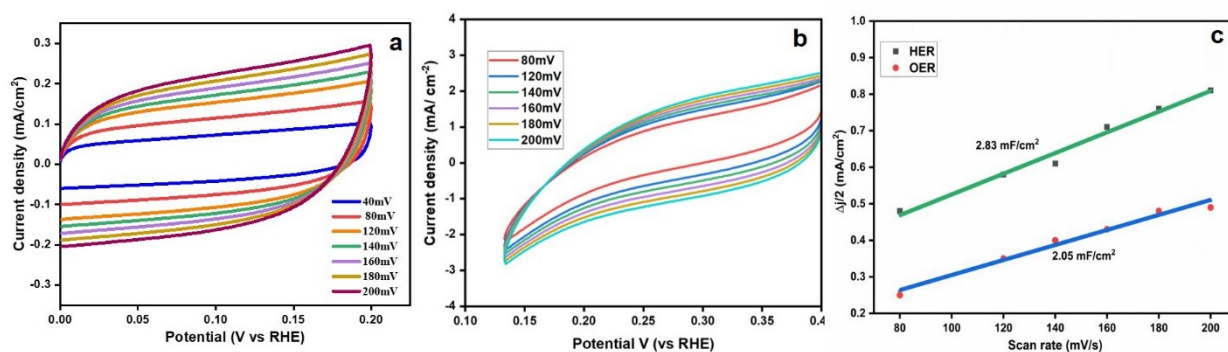

Figure S2 EDAX profile for  $\text{Ti}_{0.5}\text{Sr}_{0.5}\text{O}_3$

Figure S3 (a) ECSA profile at various scan rates for OER in non-faradic region; (b) ECSA profile at various scan rates for HER in non-faradic region; (c) Cdl plot for

$\text{Ti}_{0.5}$   
 $\text{Sr}_{0.5}$   
 $\text{O}_3/\text{N}$   
 F

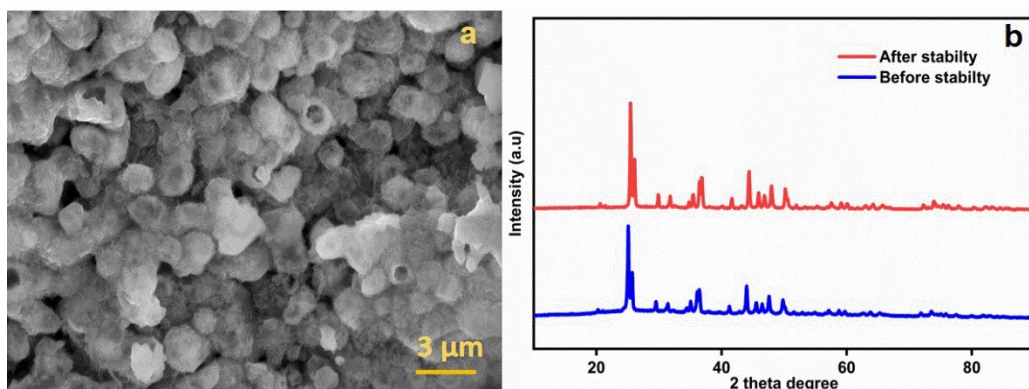

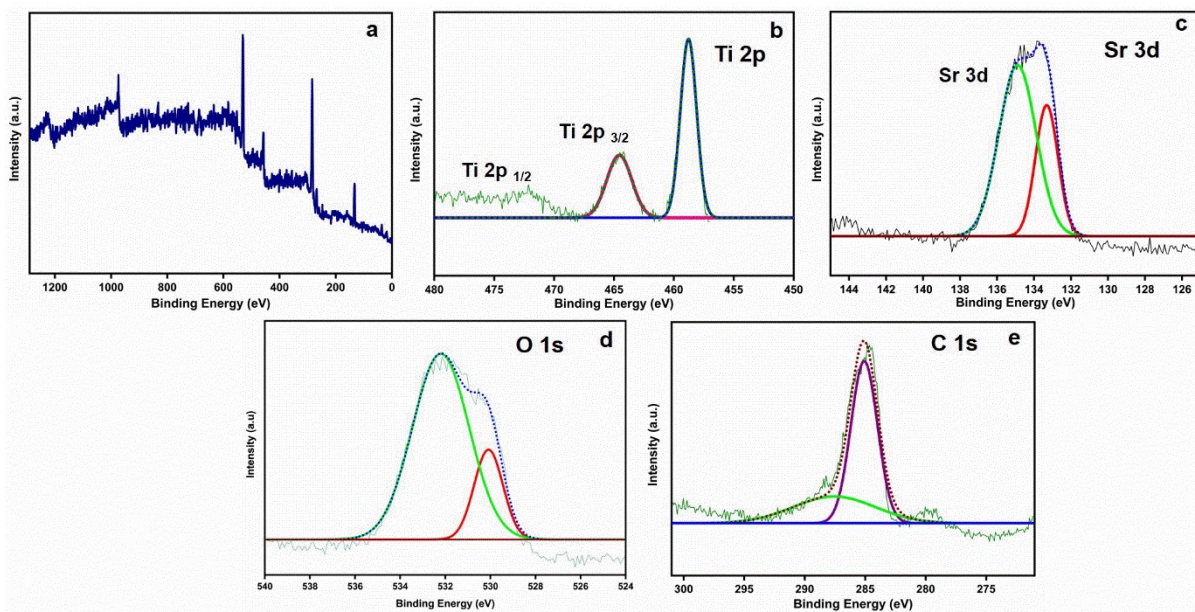

Figure S4 (a) SEM image; (b) XRD spectra of  $\text{Ti}_{0.5}\text{Sr}_{0.5}\text{O}_3/\text{NF}$  measured after long-term stability.

Figure  
spectra;  
survey  
(b) Ti 2p,  
O 1s, and

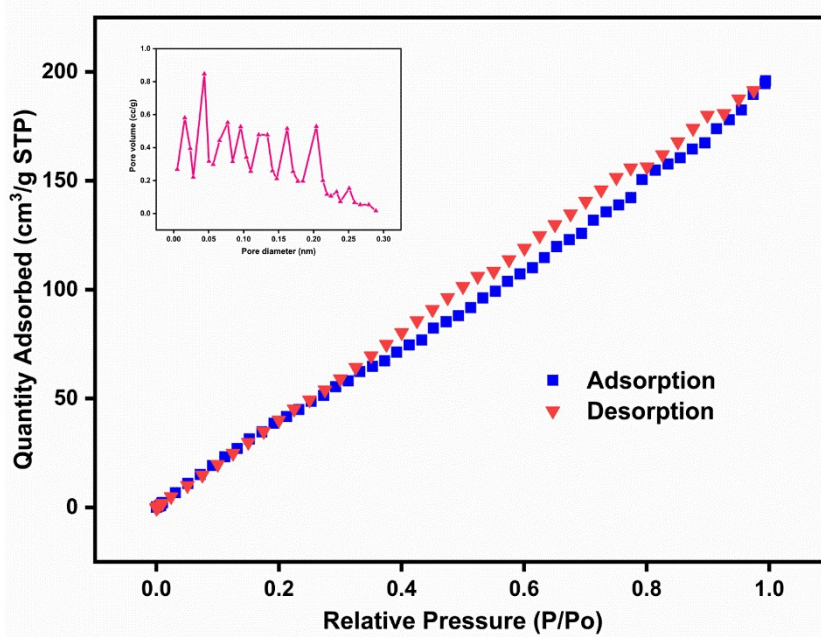

S5 XPS  
(a) XPS full  
spectra of  
 $\text{Ti}_{0.5}\text{Sr}_{0.5}\text{O}_3$ ;  
(c) Sr 3d, (d)  
(e) C 1s



**Figure S6** N<sub>2</sub> adsorption–desorption isotherms of Ti<sub>0.5</sub>Sr<sub>0.5</sub>O<sub>3</sub> (insets: corresponding pore size distribution).

**Table S1: Comparison Table of the performance of Ti<sub>0.5</sub>Sr<sub>0.5</sub>O<sub>3</sub> with recently reported catalysts.**

| S. No | Electrocatalyst                                    | Reaction | Overpotential | Tafel slope | Electrolyte | References  |
|-------|----------------------------------------------------|----------|---------------|-------------|-------------|-------------|
| 1     | CoO <sub>x</sub> -TiO <sub>2</sub>                 | OER      | 350           | 65          | 1.0 M KOH   | [1]         |
| 2     | CoS <sub>2</sub> -TiO <sub>2</sub>                 | HER/OER  | 198/231       | 61/92       | 1.0 M KOH   | [2]         |
| 3     | FeTiO <sub>3</sub>                                 | OER      | 220           | 155V        | 1.0 M KOH   | [3]         |
| 4     | Ni/TiO <sub>2</sub>                                | HER      | 46            | 41.8        | 1.0 M KOH   | [4]         |
| 5     | NiCo <sub>2</sub> O <sub>4</sub> /TiO <sub>2</sub> | HER/OER  | 185/309       | 120/55      | 1.0 M KOH   | [5]         |
| 6     | Ti <sub>0.5</sub> Sr <sub>0.5</sub> O <sub>3</sub> | HER/OER  | 101.6/299     | 179/152.5   | 1.0 M KOH   | [THIS WORK] |

1. Yan, Y.; Liu, C.; Jian, H.; Cheng, X.; Hu, T.; Wang, D.; Shang, L.; Chen, G.; Schaaf, P.; Wang, X.; Kan, E.; Zhang, T. Substitutionally Dispersed High-Oxidation  $\text{CoO}_x$  Clusters in the Lattice of Rutile  $\text{TiO}_2$  Triggering Efficient Co□Ti Cooperative Catalytic Centers for Oxygen Evolution Reactions. *Adv Funct Mater* **2021**, *31* (9). <https://doi.org/10.1002/adfm.202009610>.
2. Ganesan, P.; Sivanantham, A.; Shanmugam, S.  $\text{CoS}_2$ – $\text{TiO}_2$  Hybrid Nanostructures: Efficient and Durable Bifunctional Electrocatalysts for Alkaline Electrolyte Membrane Water Electrolyzers. *J Mater Chem A Mater* **2018**, *6* (3), 1075–1085. <https://doi.org/10.1039/C7TA09096J>.
3. Kaleeswaran, P.; Praveen Kumar, M.; Mangalaraja, R. V.; Hartley, U. W.; Sasikumar, M.; Venugopalan, R.; Rajesh Kumar, M.; Rajabathar, J. R.; Peera, S. G.; Murugadoss, G.  $\text{FeTiO}_3$  Perovskite Nanoparticles for Efficient Electrochemical Water Splitting. *Catalysts* **2021**, *11* (9), 1028. <https://doi.org/10.3390/catal11091028>.
4. Liu, Y.; Wang, X.; Yang, M.; Li, Y.; Xiao, Y.; Zhao, J. Preparation of Ru-Doped  $\text{TiO}_2$  Nanotube Arrays through Anodizing TiRu Alloys for Bifunctional HER/OER Electrocatalysts. *Nanoscale* **2023**, *15* (44), 17936–17945. <https://doi.org/10.1039/D3NR03831A>.
5. Vadakkekara, R.; Illathvalappil, R.; Kurungot, S. Layered  $\text{TiO}_2$  Nanosheet-Supported  $\text{NiCo}_2\text{O}_4$  Nanoparticles as Bifunctional Electrocatalyst for Overall Water Splitting. *ChemElectroChem* **2018**, *5* (24), 4000–4007. <https://doi.org/10.1002/celec.201801107>.
